# Supplementary material for: FAT1 Promotes EGFR-TKI Resistance in Non-Small Cell Lung Cancer Cells by Inducing Mitochondrial Autophagy
Source: Research Square preprint supplement (doi:10.21203/rs.3.rs-7937446/v1), 2025-11-28
Supplement: Supplementary file 1 [file 868b9d6936abe2e33d51599d.docx]

**FAT1 Promotes EGFR-TKI Resistance in Non-Small Cell Lung Cancer Cells by Inducing Mitochondrial Autophagy**

Chen Ding1#, Hua Huang1#, Zexia Zhao1#, Wenhao Zhao1,Xuanguang Li1, Hongbing Zhang1, Minghui Liu1, Chen Chen2, Yongwen Li2, Hongyu Liu2*, Jun Chen1,2*

1.Department of Lung Cancer Surgery, Center of Thoracic Surgery, Tianjin Medical University General Hospital, Tianjin 300052, People's Republic of China

2.Tianjin Key Laboratory of Lung Cancer Metastasis and Tumor Microenvironment, Tianjin Lung Cancer Institute, Tianjin Medical University General Hospital, Tianjin 300052, People's Republic of China

#These authors contributed equally in this work.

*Correspondence: Jun Chen: [hunterchenjun@hotmail.com](mailto:hunterchenjun@hotmail.com)

Hongyu Liu: [liuhongyu123@hotmail.com](mailto:liuhongyu123@hotmail.com)

***Supplementary Figures***


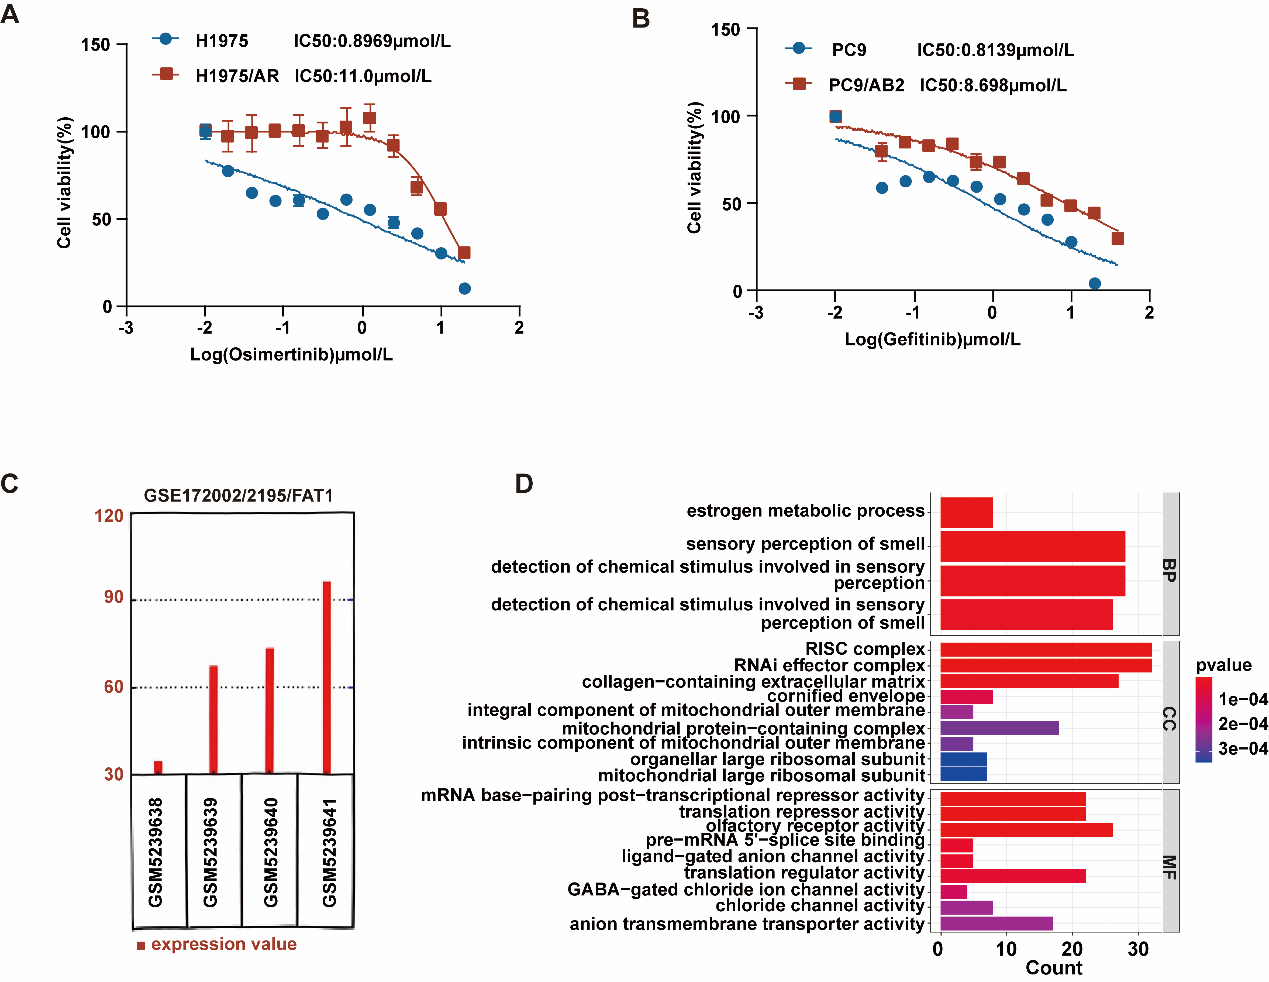


**Figure S1.** (A, B) Validation of established resistant cell lines. (C) Expression of FAT1 in Drug-Resistant Cells from the GEO Database. (D) Enrichment of Pathways Associated with FAT1 Expression Levels.


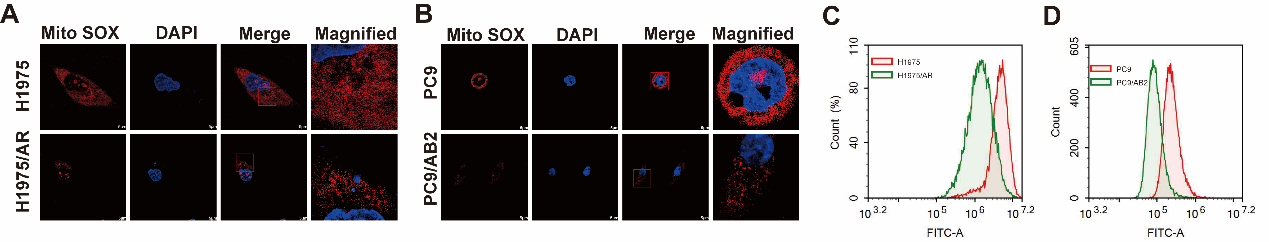


**Figure S2.** (A, B) Mitochondrial ROS levels in TKI-sensitive and -resistant NSCLC cells. (C, D) Total intracellular ROS levels in TKI-sensitive and -resistant NSCLC cells.


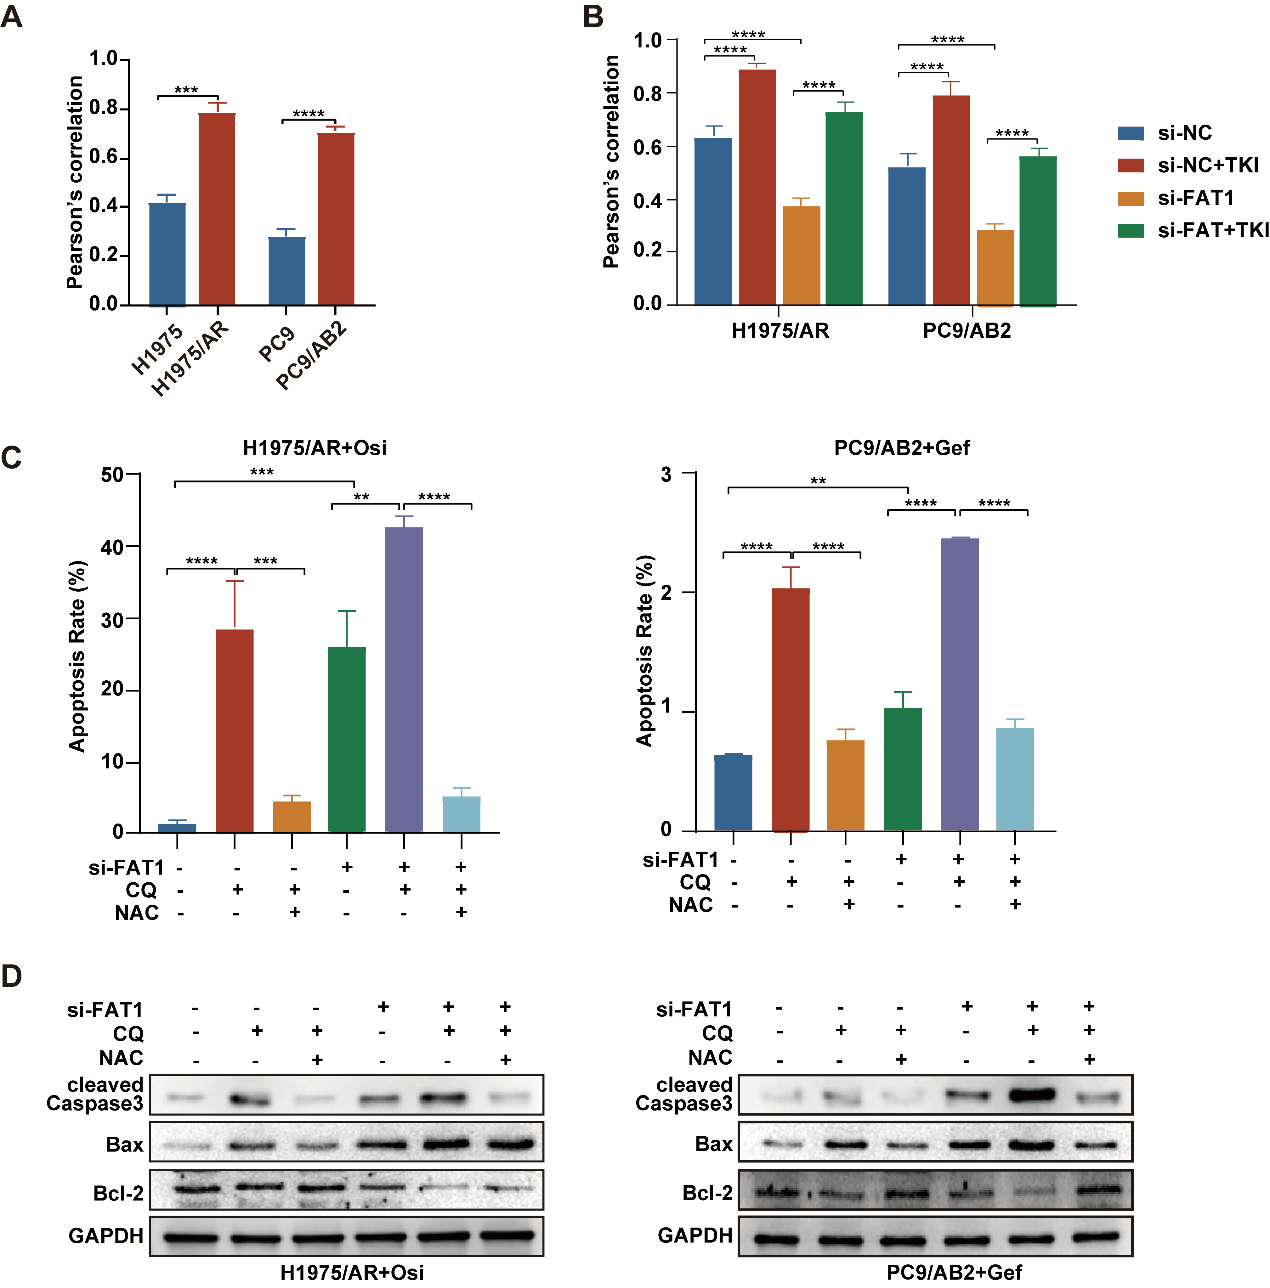


**Figure S3.** (A) Immunofluorescence staining shows differential LC3B expression between TKI-sensitive and -resistant cells. (B) LC3B levels increase following FAT1 knockdown and TKI treatment. (C) Apoptosis induced by FAT1 knockdown and CQ treatment is reversed by NAC. (D) Western blot analysis of apoptosis-related protein changes. The p-value for multiple groups was determined using ANOVA, while that for two groups was calculated using a t-test. ***p<0.001, ****p<0.0001.


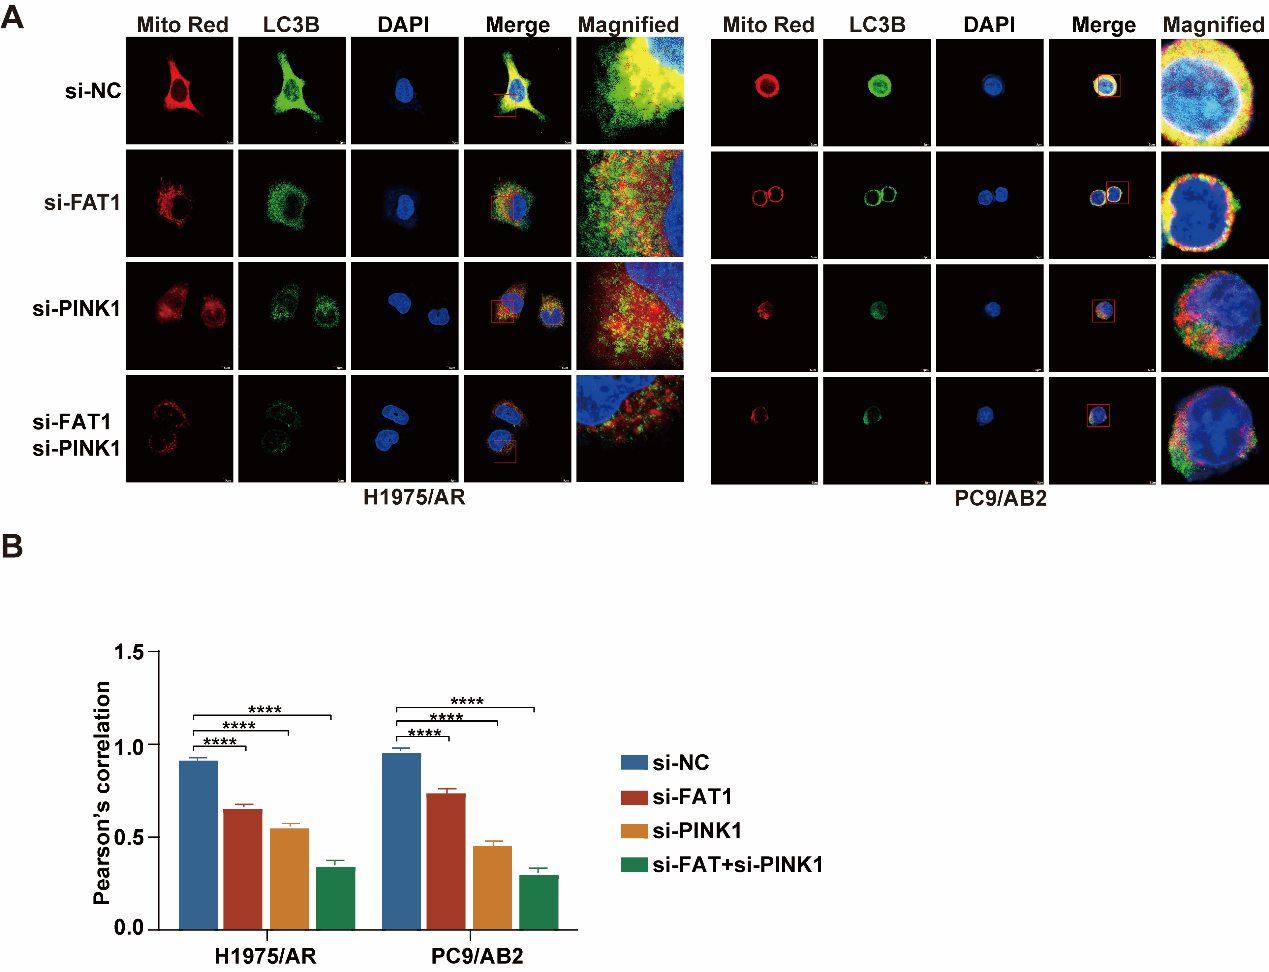


**Figure S4.** (A, B) Immunofluorescence indicates that FAT1 and PINK1 knockdown synergistically reduce LC3B expression. The p-value for multiple groups was determined using ANOVA, while that for two groups was calculated using a t-test. ****p<0.0001.


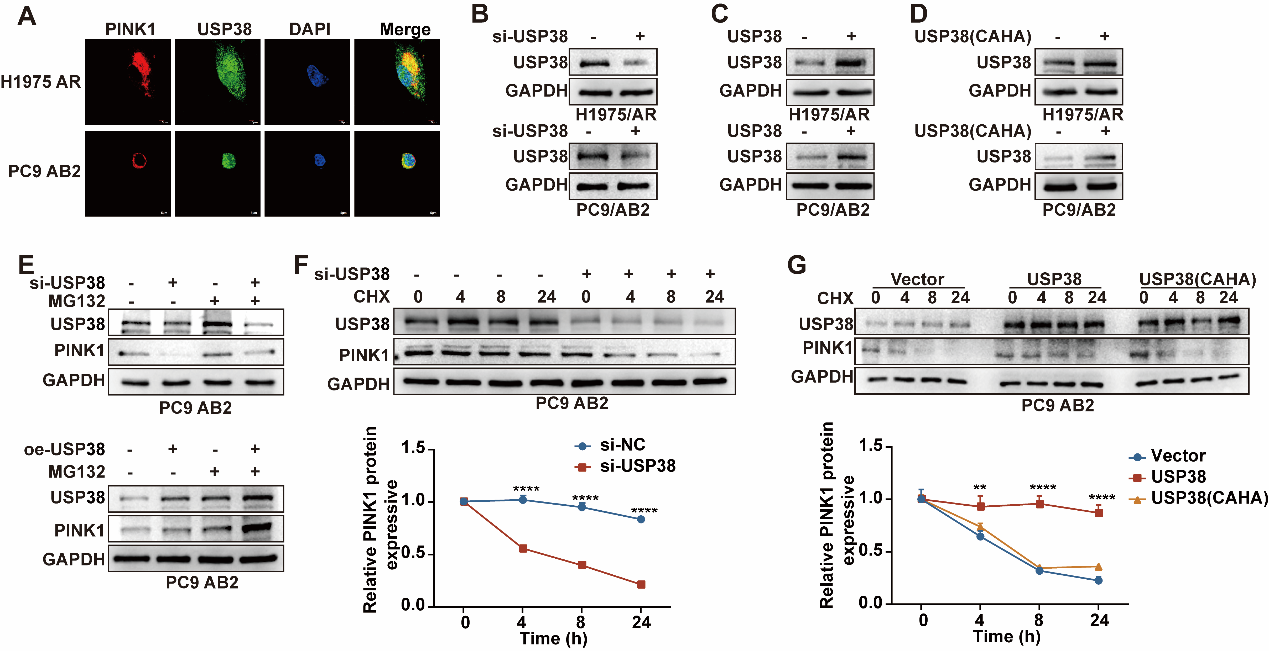


**Figure S5.** (A) Colocalization of USP38 and PINK1. (B–D) Validation of USP38 knockdown and overexpression efficiency. (E) MG-132 treatment increases PINK1 expression. (F, G) USP38 stabilizes the half-life of PINK1 protein. The p-value for multiple groups was determined using ANOVA, while that for two groups was calculated using a t-test. **p<0.01, ****p<0.0001.
